# Supplementary material for: Taming NO oxidation efficiency by γ-MnO2 morphology regulation
Source: Royal Society of Chemistry journal article supplement (doi:10.1039/d0cy00573h), 2020-01-01
Supplement: d0cy00573h1.pdf [file d0cy00573h1.pdf]

## Supplementary material

### **Taming NO oxidation efficiency by $\gamma$ -MnO<sub>2</sub> morphology regulation**

Lei Chen,<sup>a</sup> Jinping Zhang,<sup>b</sup> Yuxin Li,<sup>c</sup> Xiaomei Wu,<sup>a</sup> Zaoxiao Zhang,<sup>a,b</sup> Qiang Lu,<sup>d</sup> Chi He,<sup>b,e,\*</sup>

*<sup>a</sup>Shaanxi Key Laboratory of Energy Chemical Process Intensification, School of Chemical Engineering and Technology, Xi'an Jiaotong University, Xi'an, China*

*<sup>b</sup> State Key Laboratory of Multiphase Flow in Power Engineering, Xi'an Jiaotong University, Xi'an, China*

*<sup>c</sup>Key Laboratory of Thermo-Fluid Science and Engineering of MOE, School of Energy and Power Engineering, Xi'an Jiaotong University, Xi'an 710049, China*

*<sup>d</sup>National Engineering Laboratory for biomass Power Generation Equipment, North China Electric Power University, Beijing 102206, China*

*<sup>e</sup>National Engineering Laboratory for VOCs Pollution Control Material & Technology, University of Chinese Academy of Sciences, Beijing 101408, P.R. China*

\*To whom correspondence should be addressed:

Tel./Fax: +86 29 82663857; E-mail: chi\_he@xjtu.edu.cn (C. He)

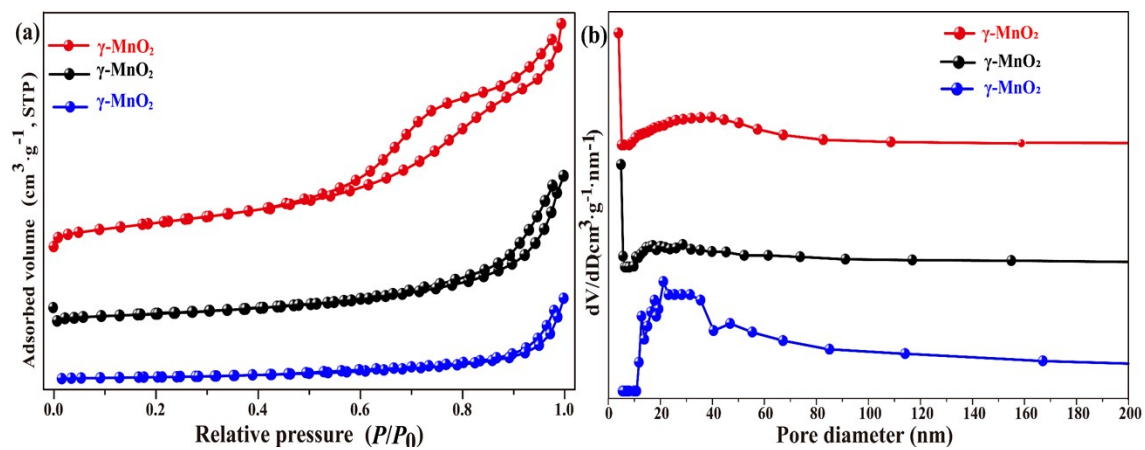

**Fig. S1** (a) N<sub>2</sub> adsorption-desorption isotherms and (b) pore distribution of  $\gamma$ -MnO<sub>2</sub> materials

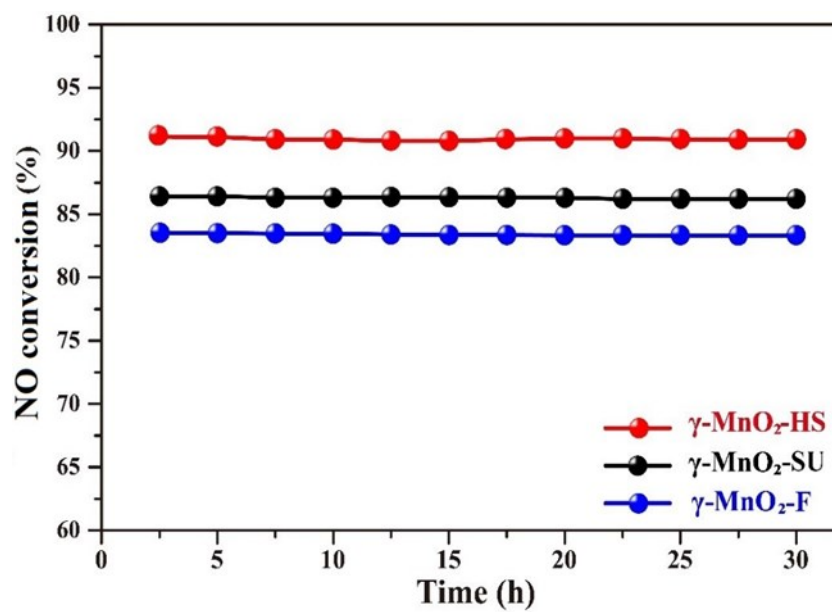

**Fig. S2** Long-term stability of NO oxidation over different nanostructured  $\gamma$ -MnO<sub>2</sub> samples.

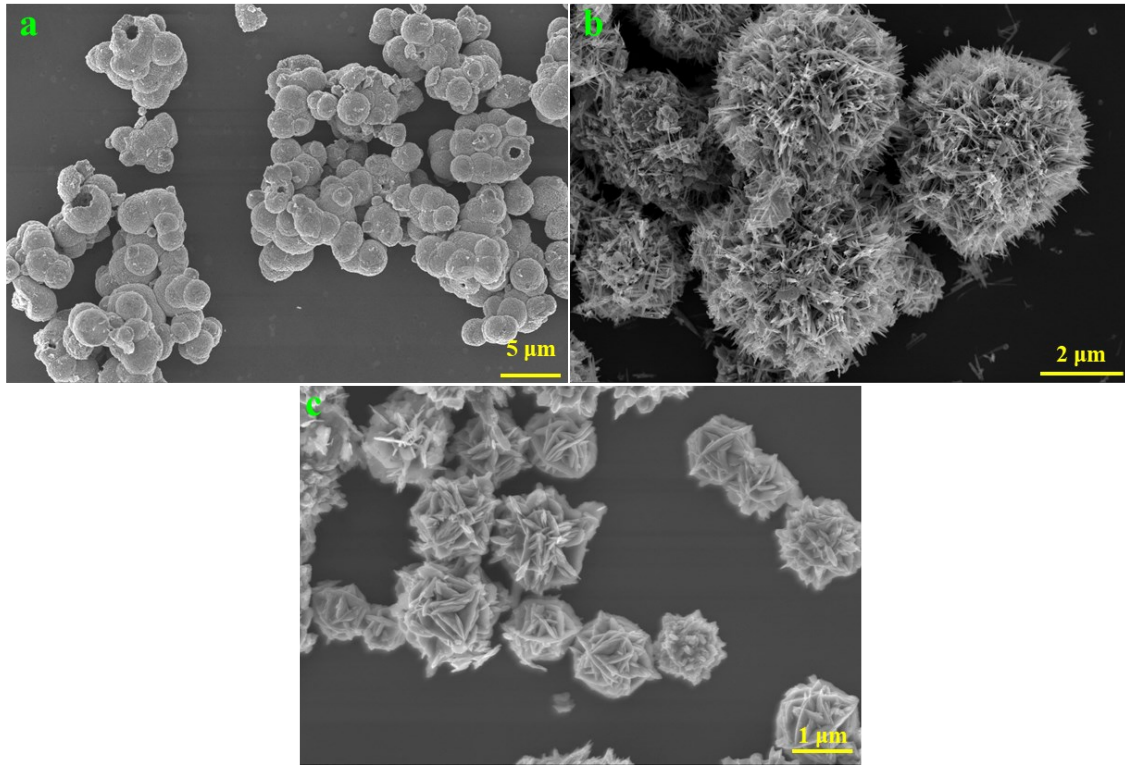

**Fig. S3** FE-SEM images of the tested  $\gamma$ -MnO<sub>2</sub> materials.

**Table S1.** Textural properties of the prepared materials.

| Sample                          | $S_{\text{BET}}^{\text{a}}$ ( $\text{m}^2 \cdot \text{g}^{-1}$ ) | $D_{\text{v}}^{\text{b}}$ ( $\text{cm}^3 \cdot \text{g}^{-1}$ ) | $D_{\text{p}}^{\text{c}}$ (nm) |
|---------------------------------|------------------------------------------------------------------|-----------------------------------------------------------------|--------------------------------|
| $\gamma\text{-MnO}_2\text{-HS}$ | 86.6                                                             | 0.23                                                            | 52.6                           |
| $\gamma\text{-MnO}_2\text{-SU}$ | 35.7                                                             | 0.15                                                            | 82.8                           |
| $\gamma\text{-MnO}_2\text{-F}$  | 9.6                                                              | 0.08                                                            | 166.6                          |

<sup>a</sup> Specific surface area calculated at  $P/P_0 = 0.05\text{-}0.30$ ; <sup>b</sup> Total pore volume measured at  $P/P_0 = 0.99$ ; <sup>c</sup> BJH pore diameter obtained from the adsorption branch.
